# Supplementary material for: Follistatin is a novel therapeutic target and biomarker in FLT3/ITD acute myeloid leukemia
Source: PubMed Central journal article supplement (PMC7136967; doi:10.15252/emmm.201910895), 2020-03-05
Supplement: EMMM-12-e10895-s001.pdf [file EMMM-12-e10895-s001.pdf]

1 **Appendix (Table of content):**

2 **1. Supplemental Figure S1 to S11 and Legends**

3 **2. Supplemental Table S1**

4

5 **Follistatin is a novel therapeutic target and biomarker in FLT3/ITD acute myeloid**  
6 **leukemia**

7 Running Title: FST as biomarker and therapeutic target

8 Bai-Liang He,<sup>1, 2, #</sup> Ning Yang,<sup>1, #</sup> Cheuk Him Man,<sup>1</sup> Nelson Ka-Lam Ng,<sup>1</sup> Chae-Yin  
9 Cher,<sup>1</sup> Ho-Ching Leung,<sup>1</sup> Leo Lai-Hok Kan,<sup>1</sup> Bowie Yik-Ling Cheng,<sup>1</sup> Stephen Sze-  
10 Yuen Lam,<sup>1</sup> Michelle Lu-Lu Wang,<sup>1</sup> Chun-Xiao Zhang,<sup>1</sup> Hin Kwok,<sup>3</sup> Grace Cheng,<sup>3</sup>  
11 Rakesh Sharma,<sup>3</sup> Alvin Chun-Hang Ma,<sup>4</sup> Chi-Wai Eric So,<sup>5</sup> Yok-Lam Kwong,<sup>1</sup> and  
12 Anskar Yu-Hung Leung<sup>1, \*</sup>

13 <sup>1</sup>Division of Hematology, Department of Medicine, Li Ka Shing Faculty of Medicine,  
14 The University of Hong Kong, 21 Sassoon Road, Pokfulam, Hong Kong SAR, China;

15 <sup>2</sup>Guangdong Provincial Key Laboratory of Biomedical Imaging, The Fifth Affiliated  
16 Hospital, Sun Yat-sen University, Zhuhai, Guangdong Province 519000, China; <sup>3</sup>Centre  
17 for Genomic Sciences, 6<sup>th</sup> Floor, The Hong Kong Jackey Club Building for  
18 Interdisciplinary Research, The University of Hong Kong, 5 Sassoon Road, Pokfulam,  
19 Hong Kong SAR, China; <sup>4</sup>Department of Health Technology and Informatics, The

20 Hong Kong Polytechnic University, Hung Hom, Kowloon, Hong Kong SAR, China;  
21 <sup>5</sup>Leukemia and Stem Cell Biology Group, Division of Cancer Studies, Department of  
22 Hematological Medicine, King's College London, Denmark Hill Campus, London SE5  
23 9NU, UK. #Contributed equally to this work.

24 \*Correspondence: **Anskar Yu-Hung Leung (M.D./Ph.D.)**

25 Address: Room K418, K Block, Queen Mary Hospital, Pokfulam, Hong Kong. Tel:  
26 (852)22553347; Fax: (852)29741165; Email: ayhleung@hku.hk

27

28 **Figure S1**

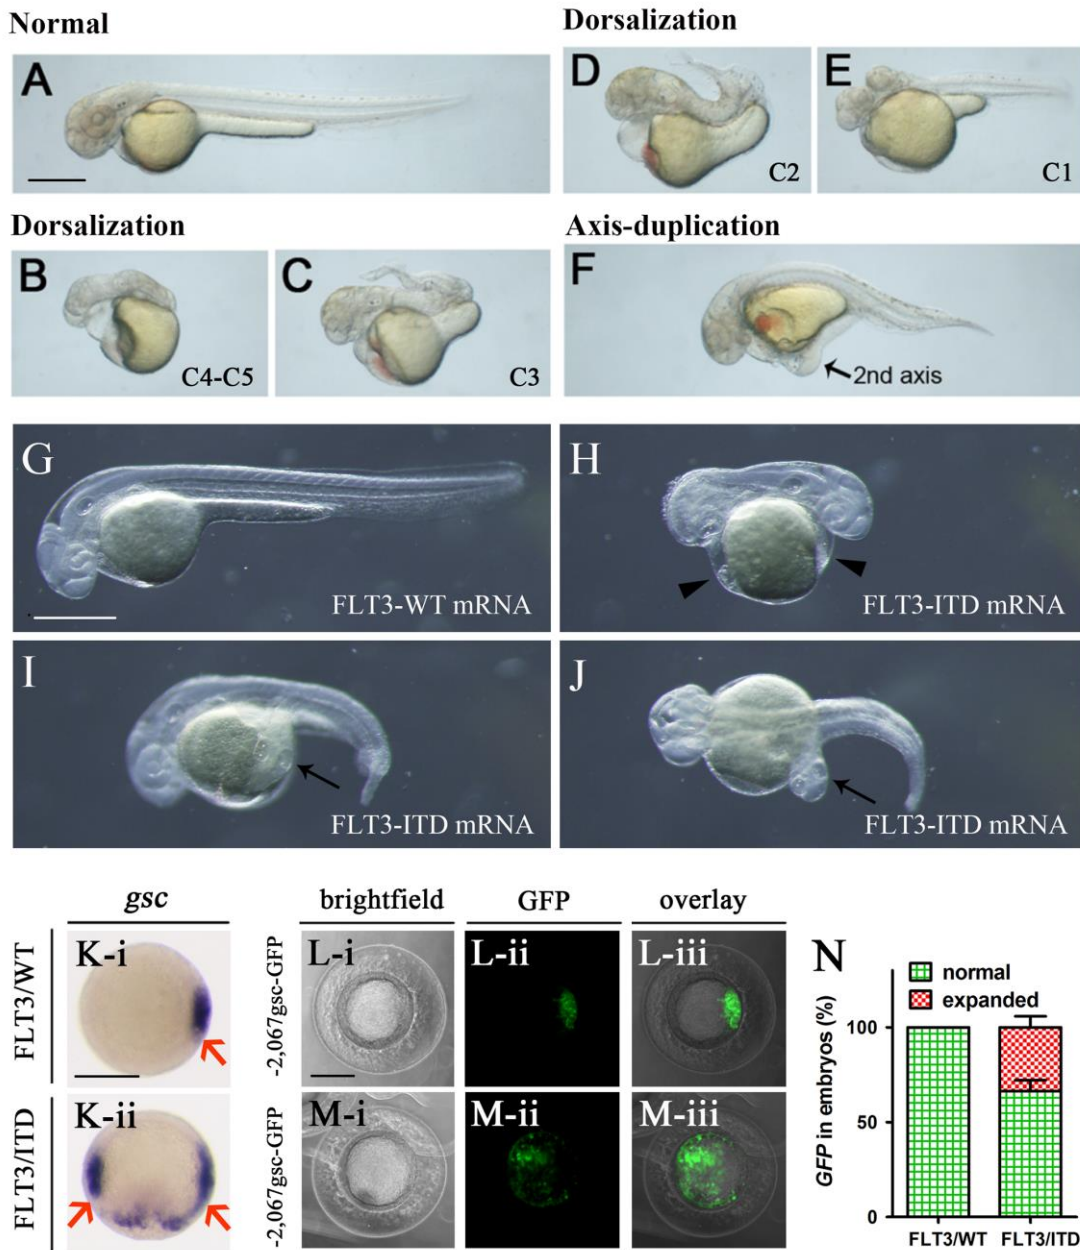

29

30 **Figure S1. *FLT3/ITD* induced axis-duplication and dorsalization in zebrafish**  
 31 **embryos.**

32 **A-F** Definition of dorsalization (C5-C1) and axis-duplication phenotype in early  
 33 zebrafish embryogenesis.

34 **G-J** The double-head and axis-duplication phenotype in *FLT3/ITD* mRNA-injected

35 zebrafish embryos at 2dpf. *FLT3*/WT mRNA-injected embryo was used as control.  
36 The arrows indicated the second head and the arrowheads indicated the duplicated  
37 hearts in the embryos.

38 **K-N** The expansion of Spemann's organizer after *FLT3*/ITD overexpression was  
39 detected by WISH of *gsc* (K, red arrows) and a -2,067*gsc*-GFP reporter assay (L and  
40 M) at 6 hpf. 50 pg plasmid vector, in which GFP expression is driven by zebrafish *gsc*  
41 promoter (-2,067), was co-injected with *FLT3*/WT or *FLT3*/ITD mRNA (150 pg) in  
42 zebrafish embryo at one-cell stage, respectively. The expression of GFP in the  
43 *FLT3*/WT- and *FLT3*/ITD-injected embryos (N) was used as a real-time *in vivo*  
44 surrogate marker for *gsc* expression and Spemann's organizer at 6 hpf.

45 Data information: Scale bar = 500  $\mu$ m. All experiments were performed in triplicates.

46

47

48 **Figure S2**

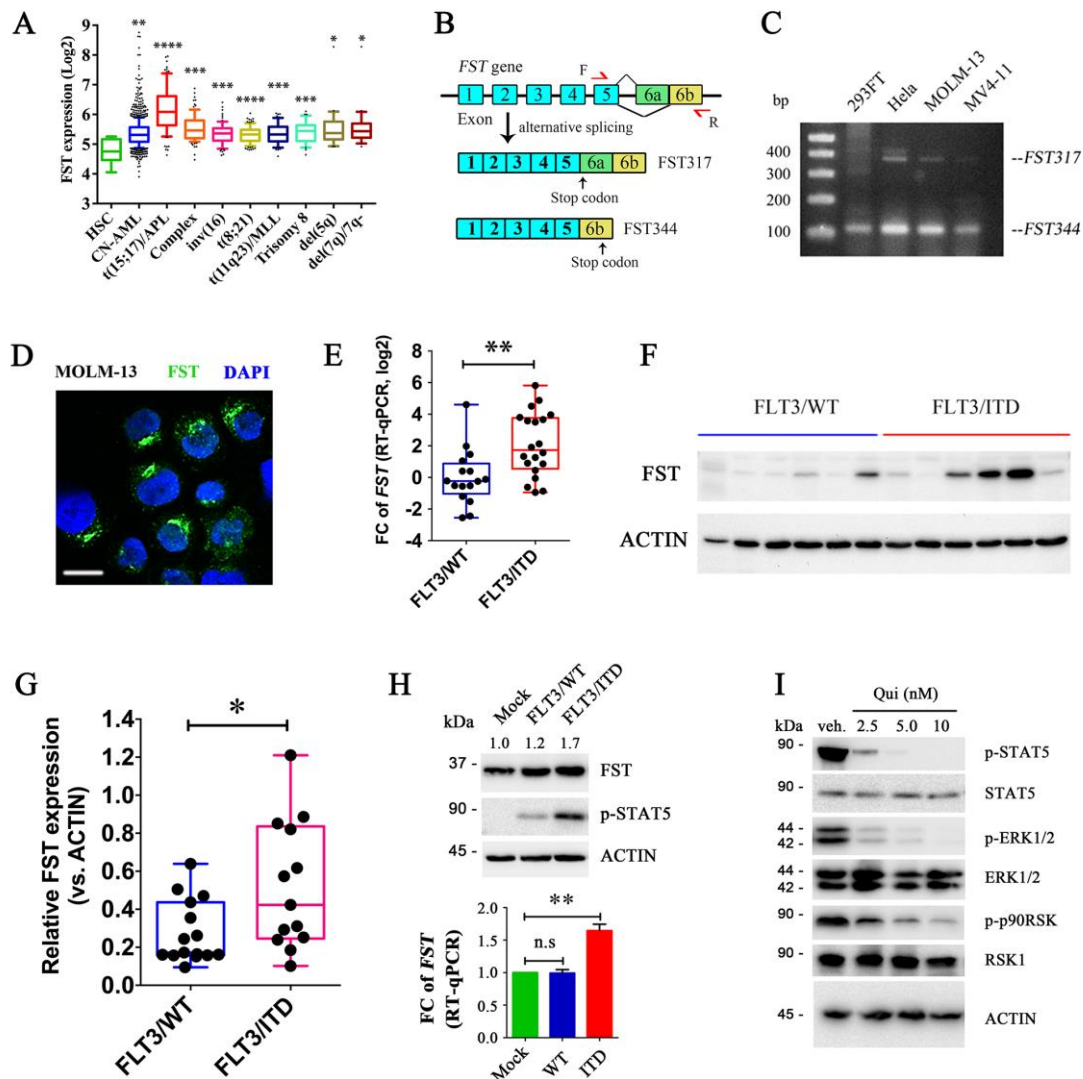

49

50 **Figure S2. *FST* was upregulated in *FLT3/ITD*-mutated AML.**

51 **A** *In-silico* analysis of *FST* expression in normal HSC and different subtypes of AML

52 using BloodSpot program. The whiskers, boxes, and central lines represents the 10<sup>th</sup>-

53 to-90<sup>th</sup> percentile, 25<sup>th</sup>-to-75<sup>th</sup> percentile, and the 50<sup>th</sup> percentile (median), respectively.

54 **B-C** Schematic representation of alternative splicing of *FST* gene (B) and RT-PCR of

55 *FST317* and *FST344* expression in 293FT, HeLa, MOLM-13 and MV4-11 cells (C).

56 **D** Detection of endogenous FST in MOLM-13 cells by immunofluorescence. Scale bar  
57 = 10  $\mu$ m.

58 **E-G** FST expression was detected by RT-qPCR (E), and Western blotting (F and G)  
59 from *FLT3*/WT and *FLT3*/ITD AML patients (cytogenetic normal, leukemia blast > 80%  
60 at diagnosis). Panel F was the representative image showing FST expression from  
61 *FLT3*/WT and *FLT3*/ITD AML.  $\beta$ -ACTIN was used for normalization and  
62 quantification of FST expression in panel G. The whiskers, boxes, and central lines  
63 represents the minimum-to-maximum values, 25<sup>th</sup>-to-75<sup>th</sup> percentile, and the 50<sup>th</sup>  
64 percentile (median), respectively.

65 **H** Phosphorylation of STAT5 and FST expression were detected by Western Blotting  
66 and RT-qPCR in Hela cells-transfected with *FLT3*/ITD. The RT-qPCR experiment were  
67 performed in triplicates.

68 **I** FLT3 signaling were detected by Western blot in Ba/F3-*FLT3*/ITD cells-treated with  
69 Quizartinib (Qui in short) *in vitro* (0-10 nM) for 1 day.

70 Data information: In (E, G and H), data were presented as mean  $\pm$  SEM. \*P<0.05,  
71 \*\*P<0.01 (Student's t-test), n.s: not significant.

72

73

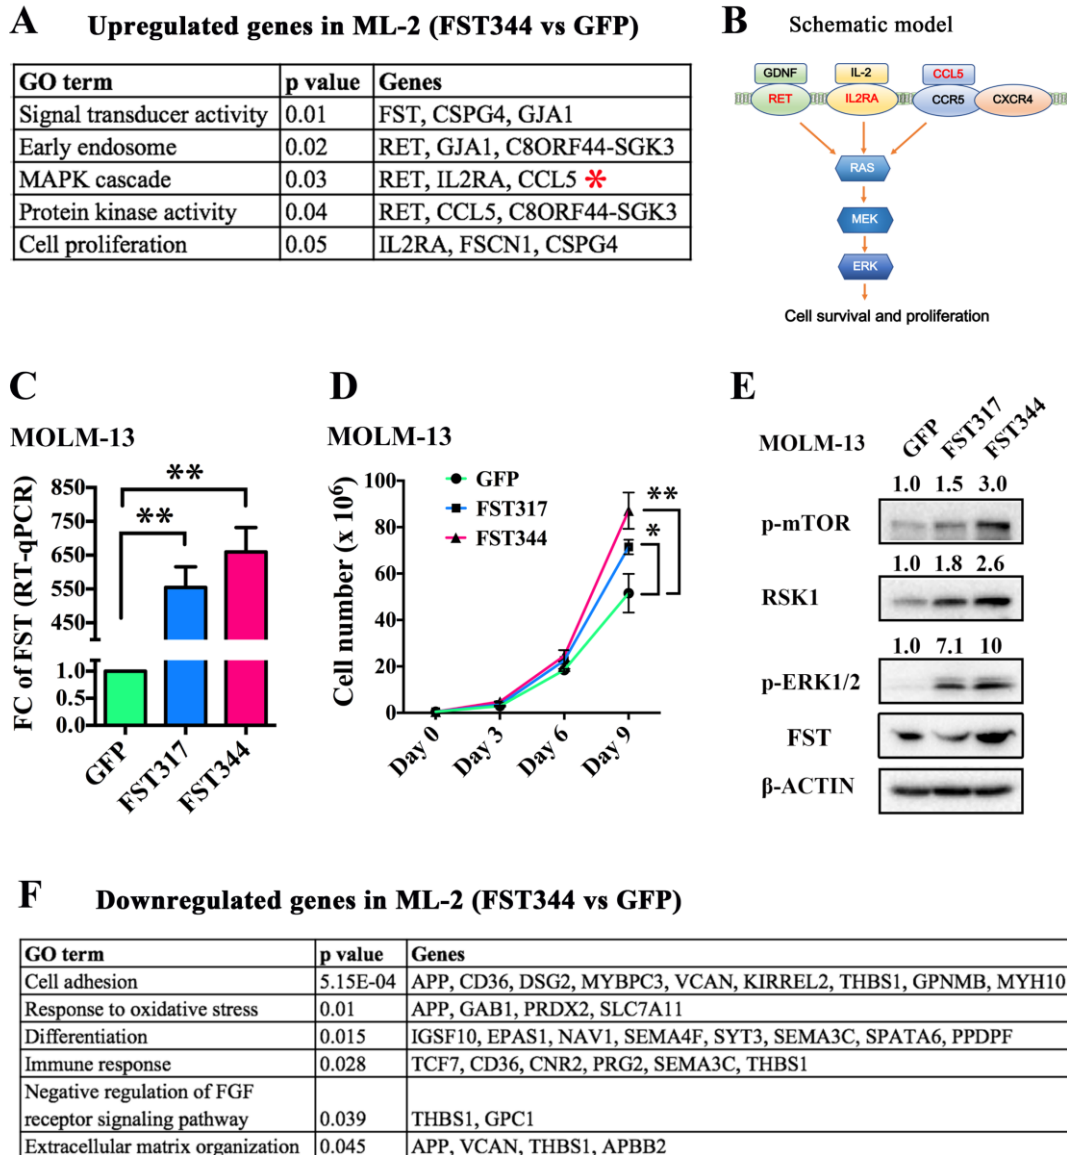

75

76 **Figure S3. Effect of *FST* overexpression on MOLM-13 and ML-2 cells.**

77 **A-B** Gene ontology (GO) analysis of upregulated genes (from RNA-seq) in ML-2 cells-  
 78 overexpressing *FST344* comparing to those of *GFP* overexpression (A). The  
 79 upregulated genes *RET*, *IL2RA* and *CCL5* (asterisk) were enriched in the MAPK  
 80 cascade which was shown in the schematic diagram in panel B.

81 **C-E** The effect of *FST* overexpression (C) on cell growth (D) and ERK activation (E)  
82 in *FLT3/ITD* MOLM-13 cells *in vitro*. The numbers above the blots indicated the fold  
83 change of p-mTOR, RSK1, and p-ERK1/2, respectively (GFP sample was used as  
84 control and set as 1). The RT-qPCR experiments were performed in triplicates.

85 **F** Gene ontology (GO) analysis of downregulated genes (from RNA-seq) in ML-2 cells-  
86 overexpressing *FST344* comparing to those of *GFP* overexpression.

87 Data information: In (C and D), data were presented as mean  $\pm$  SEM. \*P<0.05,  
88 \*\*P<0.01 (Student's t-test).

89 **Figure S4**

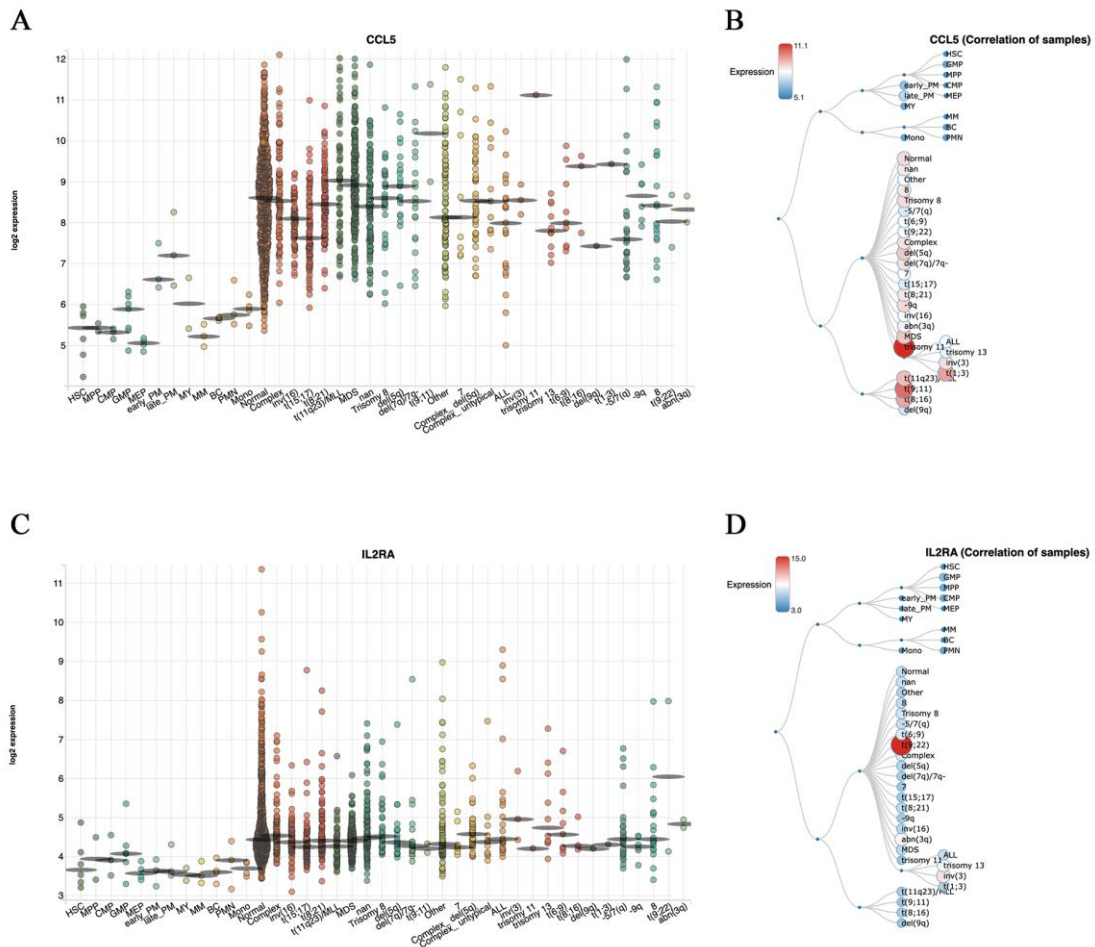

90

91 **Figure S4. In silico analysis of CCL5 and IL2RA expression in normal**  
 92 **hematopoietic tissues and human AML.**

93 **A-D** The relative expression of CCL5 (A and B) and IL2RA (C and D) in normal  
 94 hematopoietic tissues and human AML were analyzed by the public program Bloodspot  
 95 (<http://servers.binf.ku.dk/bloodspot/>).

96



97 **Figure S5**

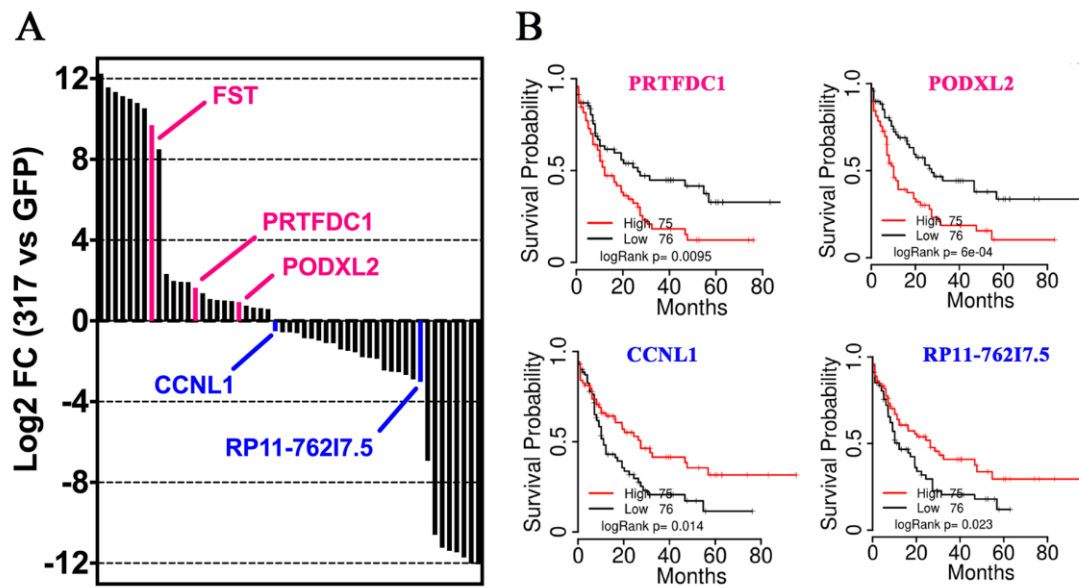

98

99 **Figure S5. RNA-seq showing the differentially expressed gene after FST317**  
100 **overexpression in ML-2.**

101 **A** The differentially expressed genes in ML-2 cells (FST317 vs GFP) were shown as  
102 waterfall plot.

103 **B** The clinical relevance of these differentially expressed genes were analyzed based  
104 on the patients' survival data from TCGA-AML. Upregulation of *PRTFDC1* and  
105 *PODXL2*, and downregulation of *CCNL1* and *RP11-762I7.5* after *FST317*  
106 overexpression in ML-2 predicted the poor survival of AML patients.

107

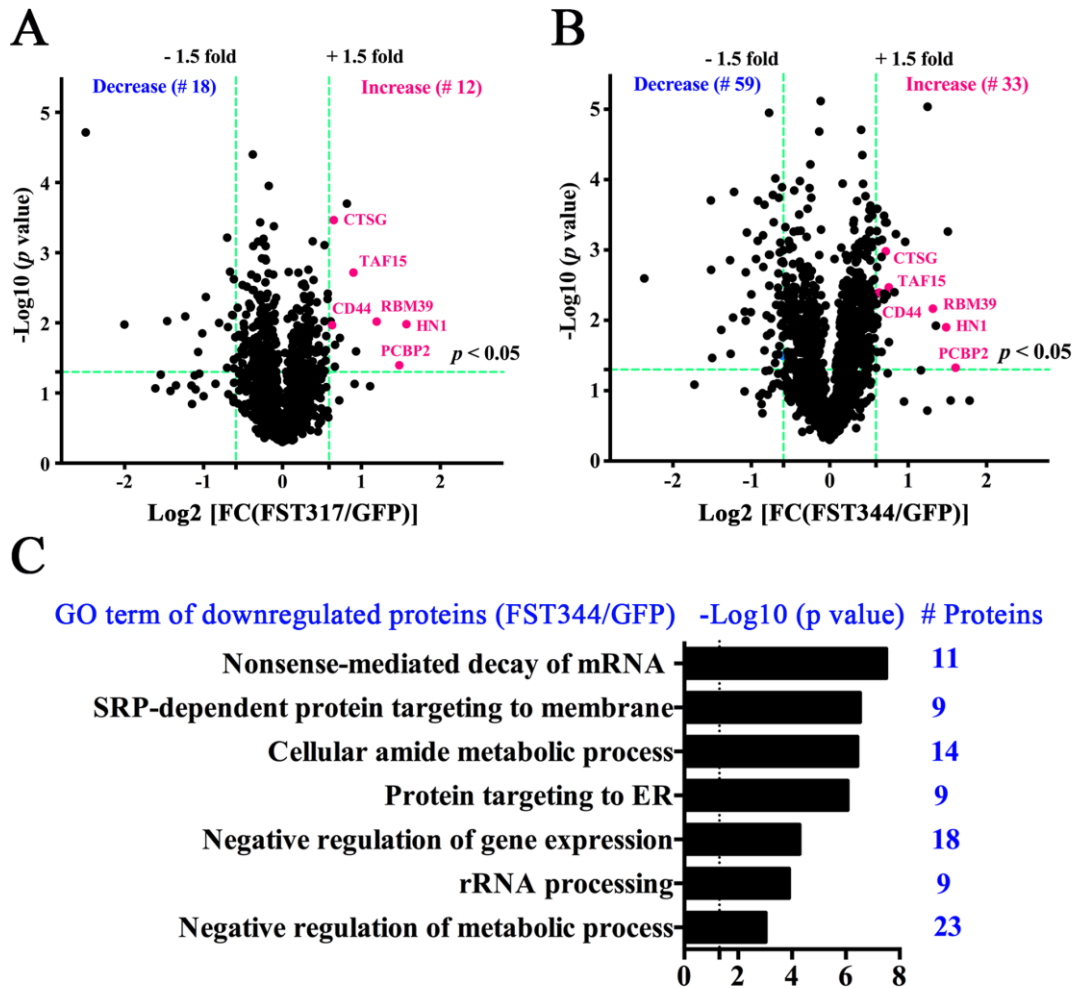

109

110 **Figure S6. Proteomic analysis of ML-2 cells after *FST* overexpression.**

111 **A-B** Volcano plot showing differentially expressed proteins after *FST317* and *FST344*  
 112 overexpression in ML-2 comparing to those of *GFP* overexpression. CTSG, TAF15,  
 113 CD44, RBM39, HN1, and PCBP1 were significantly upregulated in both *FST317* and  
 114 *FST344*-overexpressing ML-2 cells.

115 **C** Gene ontology (GO) analysis of downregulated proteins in ML-2 cells-  
 116 overexpressing *FST344* comparing to those of *GFP*. The downregulated proteins

117 associated with nonsense-mediated decay of mRNA were most significant.

118

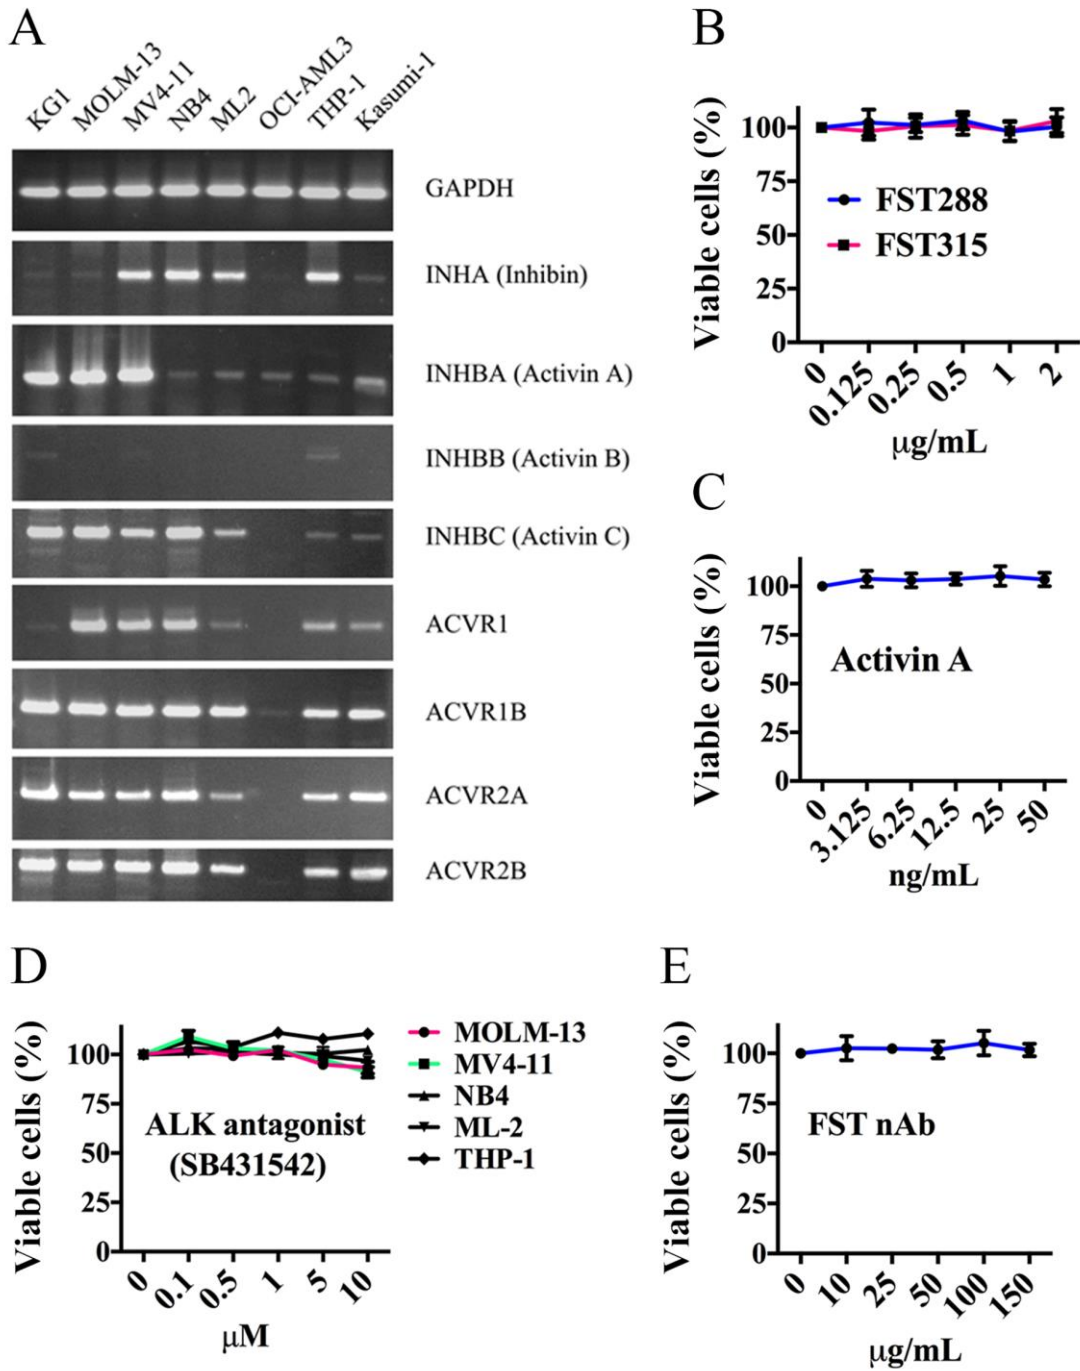

120

121 **Figure S7. Exogenous FST and Activin treatment on AML cell growth.**

122 **A** Gene expression of Activin and its receptors in AML cell lines by semi-quantitative

123 PCR. *GAPDH* was used as house-keeping gene.

124 **B-C** The effect of exogenous FST and Activin A on MOLM-13 cell growth after 3 days  
125 treatment *in vitro*.

126 **D** The effect of Activin receptor antagonist (SB431542) on cell growth of different  
127 AML cell lines after 3 days treatment *in vitro*.

128 **E** The effect of FST neutralizing antibody on MOLM-13 cell growth after 3 days  
129 treatment *in vitro*.

130 Data information: In (B-E), the data were presented as mean  $\pm$  SEM.

131

132

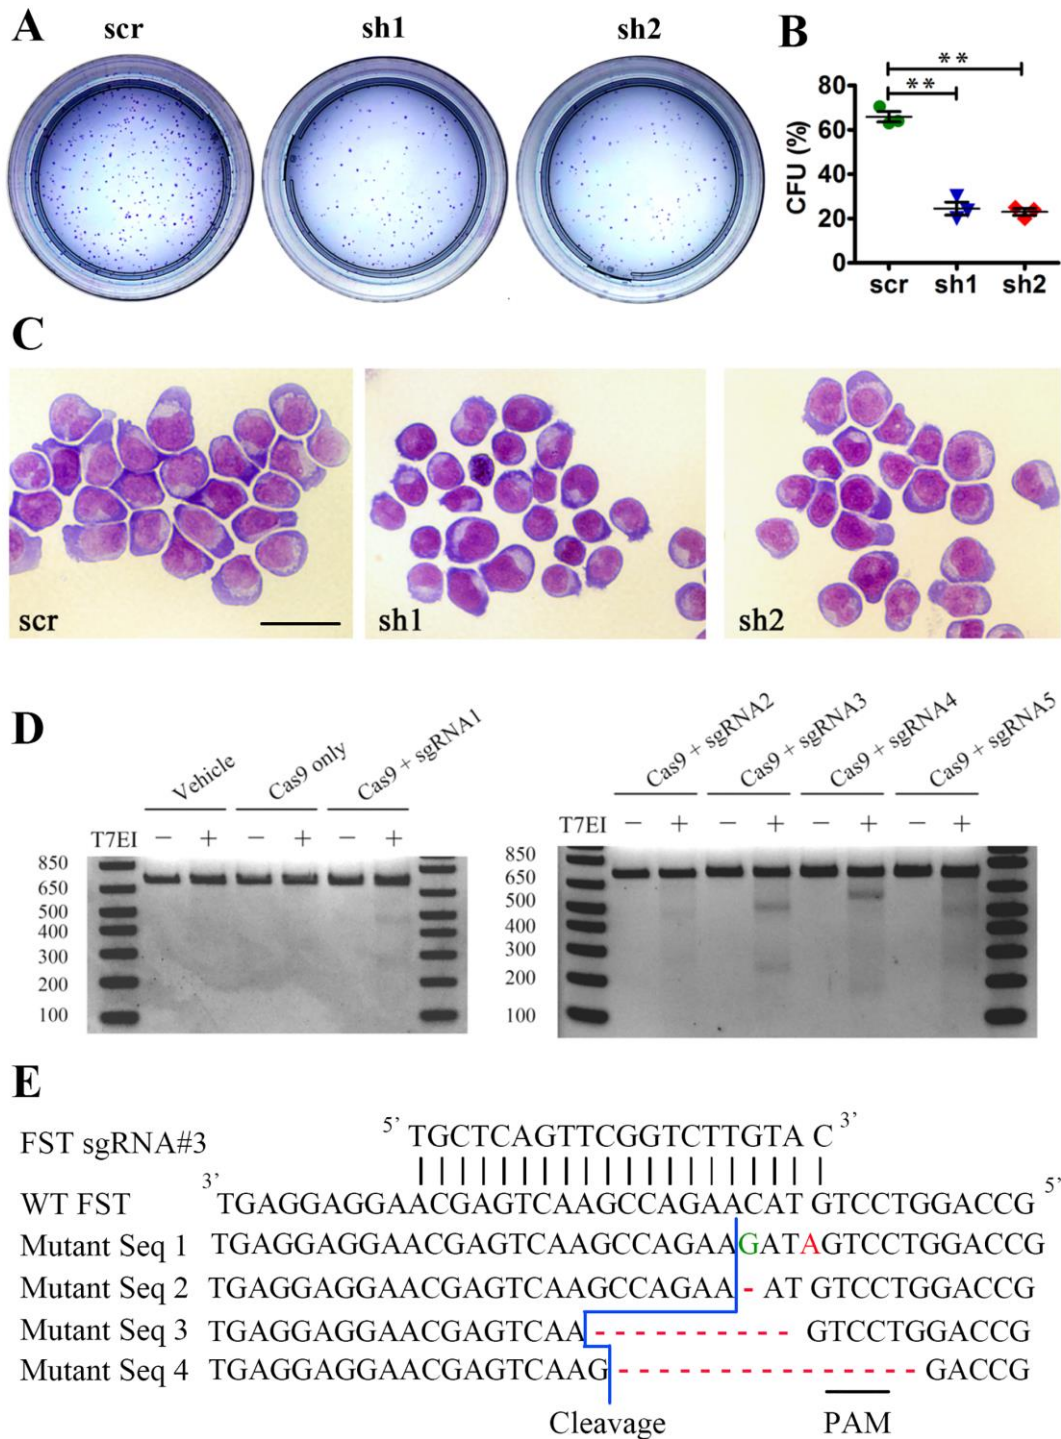

134

135 **Figure S8. *FST* targeting by shRNA and CRISPR/Cas9 in *FLT3*/ITD AML cell**  
 136 **lines.**

137 **A-C** The clonogenicity (A and B) and morphology (C) of MV4-11 cells after *FST*

138 knockdown *in vitro*. Scale bar = 20  $\mu$ m (C). In (B), the data were presented as mean  $\pm$   
139 SEM. \*\*P<0.01 (Student's t-test)

140 **D-E** T7EI assay (D) and sanger sequencing (E, for sgRNA#3) detecting the genome  
141 editing efficiency of different sgRNAs for human *FST* in 293FT cells. Genomic DNA  
142 was extracted from 293FT cells at 3 days post transfection. Fragments containing the  
143 sgRNA target sites were PCR amplified, purified, denatured, annealed to form the  
144 heteroduplex, and digested with or w/o T7 Endonuclease I (T7EI) (D). To detect these  
145 insertion and deletion, fragments containing the sgRNA#3 target site were ligated into  
146 pGEM-T-easy vector for sanger sequencing (E). Green: mismatch; Red: insertion and  
147 deletion; PAM: protospacer adjacent motif.

148

149

150 **Figure S9**

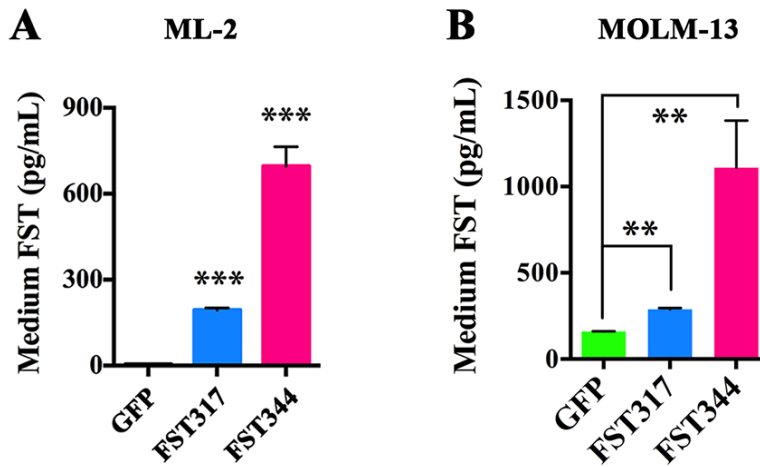

151

152 **Figure S9. *FST* overexpression resulted in increased FST level in culture medium.**

153 FST in the culture medium was measured by ELISA from ML-2 (A) and MOLM-13

154 (B) cells stably expressing *GFP*, *FST317*, and *FST344*, respectively. The ELISA

155 experiments were performed in triplicates and the data were presented as mean  $\pm$  SEM.

156 \*\*P<0.01, \*\*\*P<0.001 (Student's t-test)

157

158



159 **Figure S10**

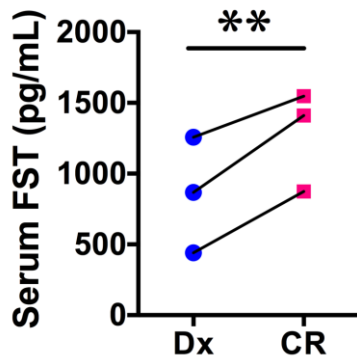

160

161 **Figure S10. Serum FST level from FLT3/WT AML patients treated with**  
162 **conventional chemotherapy.**

163 Serum FST levels were measured by ELISA from FLT3/WT AML patients treated with  
164 conventional “7+3” chemotherapy at diagnosis (Dx) and complete remission (CR). The  
165 data were presented as scatter dot plot. \*\*P<0.01 (Student’s t-test).

166

167 **Figure S11**

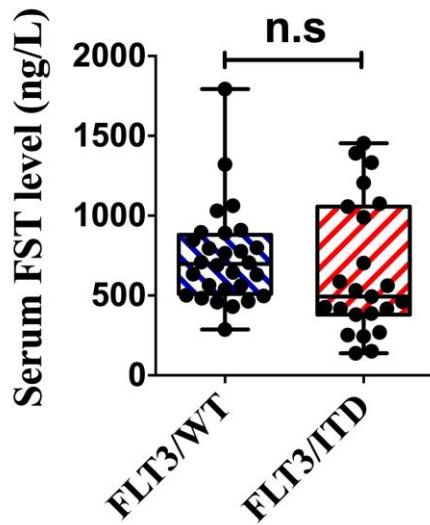

168

169 **Figure S11. Serum FST levels from FLT3/WT and FLT3/ITD AML patients from**  
170 **our achieved samples.**

171 Serum FST levels were measured by ELISA from FLT3/WT and FLT3/ITD AML  
172 patients at diagnosis. The data were presented in box plot. The whiskers, boxes, and  
173 central lines represented the minimum-to-maximum values, 25<sup>th</sup>-to-75<sup>th</sup> percentile, and  
174 the 50<sup>th</sup> percentile (median), respectively. n.s: not significant (Student's t-test).

175

176

177

178 **Supplemental Table S1**

| <b>Figure and panel</b> | <b>comparing groups</b>                    | <b>p-value</b> | <b>Symbol</b> |
|-------------------------|--------------------------------------------|----------------|---------------|
| Fig 1, panel K          | DMSO vs Qui 5.0 $\mu$ M (dorsalization)    | 1.51E-04       | ***           |
|                         | DMSO vs Qui 5.0 $\mu$ M (axis duplication) | 1.15E-04       | ***           |
| Fig 1, panel L          | FLT3/WT vs FLT3/ITD (fst)                  | 5.74E-03       | **            |
|                         | FLT3/WT vs FLT3/ITD (gsc)                  | 7.95E-03       | **            |
|                         | FLT3/WT vs FLT3/ITD (fzd4)                 | 3.23E-02       | *             |
| Fig 2, panel N          | WT vs ITD                                  | 1.17E-04       | ***           |
| Fig 2, panel O          | WT vs ITD                                  | 9.23E-03       | **            |
| Fig 3, panel C          | IgG vs p-CREB (c-Fos)                      | 1.09E-04       | ***           |
|                         | IgG vs p-CREB (FST)                        | 3.28E-03       | **            |
| Fig 3, panel D          | Red vs purple                              | 5.99E-05       | ***           |
|                         | Green vs purple                            | 9.72E-04       | ***           |
| Fig 3, panel G          | Ba/F3-P vs Ba/F3-ITD (DMSO)                | 7.37E-05       | ***           |
|                         | DMSO vs Qui-2.5 nM (Ba/F3-ITD)             | 9.54E-05       | ***           |
|                         | DMSO vs Qui-5.0 nM (Ba/F3-ITD)             | 1.17E-05       | ***           |
|                         | DMSO vs Qui-10 nM (Ba/F3-ITD)              | 1.11E-05       | ***           |
| Fig 3, panel H          | DMSO vs Qui-10 nM                          | 2.42E-04       | ***           |
| Fig 3, panel J          | DMSO vs BRD7389 (Ba/F3-ITD)                | 8.76E-04       | ***           |
|                         | DMSO vs BRD7389 (MOLM-13)                  | 1.39E-03       | **            |
|                         | DMSO vs BRD7389 (MV4-11)                   | 1.18E-03       | **            |
| Fig 4, panel B          | Green vs blue                              | 2.42E-03       | **            |
|                         | Green vs red                               | 4.26E-03       | **            |
| Fig 4, panel C          | Green vs blue                              | 7.91E-03       | **            |
|                         | Green vs red                               | 7.40E-03       | **            |
| Fig 4, panel E          | Green vs blue                              | 2.06E-02       | *             |
|                         | Green vs red                               | 5.20E-03       | **            |
| Fig 4, panel G          | Green vs red                               | 2.90E-03       | **            |
| Fig 4, panel H          | GFP vs FST317                              | 3.40E-02       | *             |
|                         | GFP vs FST344                              | 2.40E-03       | **            |
| Fig 4, panel J          | GFP vs FST344 (RET)                        | 8.33E-03       | **            |
|                         | GFP vs FST344 (IL2RA)                      | 2.08E-02       | *             |
|                         | GFP vs FST344 (CCL5)                       | 9.33E-04       | ***           |

|                 |                                              |          |      |
|-----------------|----------------------------------------------|----------|------|
| Fig 5, panel C  | scr vs sh1                                   | 8.42E-03 | **   |
|                 | scr vs sh2                                   | 3.42E-03 | **   |
| Fig 5, panel E  | scr vs sh1                                   | 1.90E-02 | *    |
|                 | scr vs sh2                                   | 5.70E-03 | **   |
| Fig 5, panel G  | Green vs blue                                | 4.58E-02 | *    |
|                 | Green vs red                                 | 3.16E-02 | *    |
| Fig 5, panel H  | scr vs sh1                                   | 5.34E-03 | **   |
|                 | scr vs sh2                                   | 3.29E-03 | **   |
| Fig 6, panel B  | Cas9 vs sgRNA#3                              | 6.22E-03 | **   |
|                 | Cas9 vs sgRNA#4                              | 5.32E-03 | **   |
| Fig 6, panel D  | Cas9 vs sgRNA#3                              | 4.45E-02 | *    |
|                 | Cas9 vs sgRNA#4                              | 2.89E-02 | *    |
| Fig 6, panel F  | Neg-ASO vs FST-ASO3                          | 7.13E-03 | **   |
| Fig 6, panel G  | Neg-ASO vs FST-ASO3                          | 9.41E-03 | **   |
| Fig 7, panel C  | Flt3 <sup>+/+</sup> vs Flt3 <sup>ITD/+</sup> | 9.70E-03 | **   |
| Fig 7, panel D  | Flt3 <sup>+/+</sup> vs Flt3 <sup>ITD/+</sup> | 9.80E-03 | **   |
| Fig 7, panel G  | pre-injection vs week 2                      | 1.55E-02 | *    |
| Fig 7, panel H  | scr vs sh1                                   | 3.64E-02 | *    |
|                 | scr vs sh2                                   | 3.54E-02 | *    |
| Fig 7, panel K  | Pre vs week 6                                | 8.89E-03 | **   |
| Fig 7, panel N  | Pre vs 1                                     | 6.72E-03 | **   |
|                 | Pre vs 2                                     | 3.74E-03 | **   |
| Fig S2, panel A | HSC vs CN-AML                                | 2.70E-03 | **   |
|                 | HSC vs t(15;17)/APL                          | 6.00E-05 | **** |
|                 | HSC vs Complex                               | 1.00E-04 | ***  |
|                 | HSC vs inv(16)                               | 2.00E-04 | ***  |
|                 | HSC vs t(8;21)                               | 7.00E-05 | **** |
|                 | HSC vs t(11q23)/MLL                          | 3.00E-04 | ***  |
|                 | HSC vs Trisomy 8                             | 5.00E-04 | ***  |
|                 | HSC vs del(5q)                               | 1.70E-02 | *    |
|                 | del(7q)/7q-                                  | 1.26E-02 | *    |
| Fig S2, panel E | FLT3/WT vs FLT3/ITD                          | 2.60E-03 | **   |
| Fig S2, panel G | FLT3/WT vs FLT3/ITD                          | 3.76E-02 | *    |

|                 |                       |          |     |
|-----------------|-----------------------|----------|-----|
| Fig S2, panel H | Mock vs ITD           | 7.32E-03 | **  |
| Fig S3, panel C | GFP vs FST317         | 5.96E-03 | **  |
|                 | GFP vs FST344         | 4.78E-03 | **  |
| Fig S3, panel D | FST317 vs GFP (Day 9) | 2.12E-02 | *   |
|                 | FST344 vs GFP (Day 9) | 4.64E-03 | **  |
| Fig S8, panel B | scr vs sh1            | 5.22E-03 | **  |
|                 | scr vs sh2            | 3.96E-03 | **  |
| Fig S9, panel A | FST317 vs GFP         | 2.84E-04 | *** |
|                 | FST344 vs GFP         | 6.15E-04 | *** |
| Fig S9, panel B | FST317 vs GFP         | 2.04E-03 | **  |
|                 | FST344 vs GFP         | 9.25E-03 | **  |
| Fig S10         | Dx vs CR              | 9.79E-03 | **  |

179 **Supplemental Table S1**

180 The p-values in the main figures and Appendix were summarized. \*P<0.05, \*\*P<0.01,

181 \*\*\*P<0.001.

182

183
